# Supplementary material
Source: PubMed Central journal article supplement (PMC3074986)
Supplement: supp_00530.2010_Revised_Figure_3_Legend.pdf [file supp_00530.2010_Revised_Figure_3_Legend.pdf]

Figure 3. **PDZD11 coimmunoprecipitates with hSMVT from Caco-2 cells.** Immunoprecipitation of FLAG-PDZD11 (A; see note below) or FLAG-hSMVT (B) from Caco-2 cell lysates was performed on anti-FLAG M2 affinity gel, and immunoprecipitates (IP) were analysed by immunoblotting using the antibodies indicated. Control IP, immunoprecipitate obtained from nontransfected cells. Note: The boxed lanes of Figure 3A (left panel) are from non-adjacent lanes of the same gel and are grouped together for clarity.
