# Supplementary material
Source: PubMed Central journal article supplement (PMC3074986)

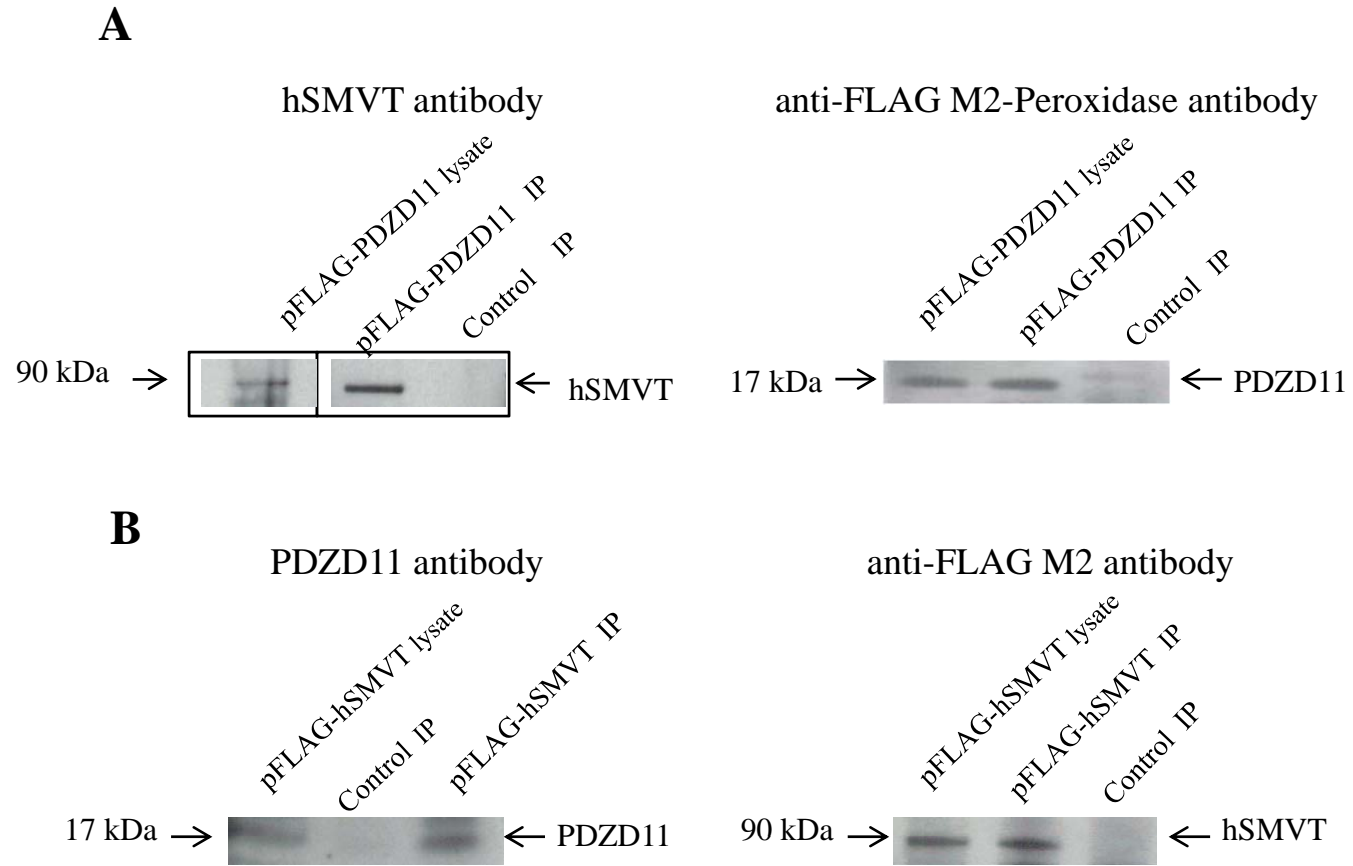

Figure 3.

Supplement: supp_00530.2010_Revised_Figure_3.pdf [file supp_00530.2010_Revised_Figure_3.pdf]
